# Supplementary material
Source: publisher figshare collection journal article supplement (https://acs.figshare.com/ndownloader/files/4080388)

# Pollenkitt Wetting Mechanism Enables Surface-Tunable and Species-Dependent Adhesion of Pollen

*Haisheng Lin, Ismael Gomez and J. Carson Meredith\**

School of Chemical & Biomolecular Engineering, Georgia Institute of Technology, 311 Ferst Drive NW, Atlanta, Georgia 30332-0100

**Table S1.** Surface Roughness and Static Water Contact Angles<sup>a</sup> of the Various Substrates

| Surface           | Si         | PVOH       | PVAc       | PS          |
|-------------------|------------|------------|------------|-------------|
| Ra(nm)            | 0.2 ± 0.1  | 1.1 ± 0.1  | 1.3 ± 0.1  | 2.2 ± 0.2   |
| rms (nm)          | 0.3 ± 0.1  | 1.3 ± 0.1  | 1.7 ± 0.1  | 2.7 ± 0.2   |
| Contact Angle (°) | 13.7 ± 1.3 | 46.2 ± 1.4 | 60.7 ± 2.9 | 101.1 ± 3.0 |

<sup>a</sup> All uncertainties are 95% confidence intervals.

**Figure S1.** Adhesion forces of clean pollen grains on a Piranha-cleaned silicon surface under varied relative humidity.

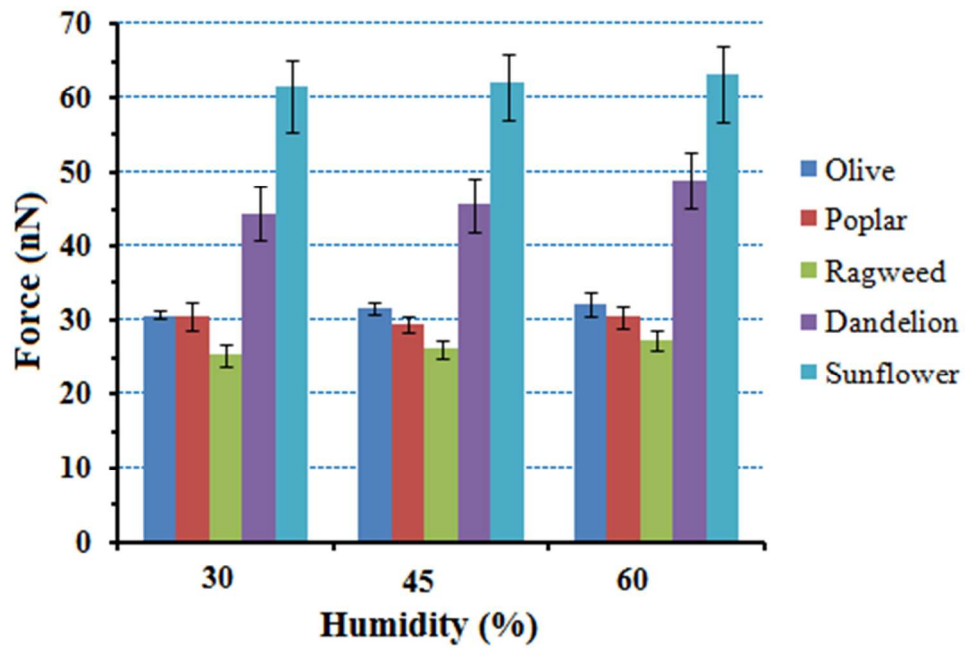

Supplement: Supplementary file 1 [file 4080388]
